# Supplementary material for: The L467F-F508del Complex Allele Hampers Pharmacological Rescue of Mutant CFTR by Elexacaftor/Tezacaftor/Ivacaftor in Cystic Fibrosis Patients: The Value of the Ex Vivo Nasal Epithelial Model to Address Non-Responders to CFTR-Modulating Drugs
Source: MDPI journal article supplement (doi:10.3390/ijms23063175), 2022-03-15
Supplement: s1 [file s1]

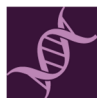

Supplementary Figure

# The L467F-F508del Complex Allele Hampers Pharmacological Rescue of Mutant CFTR by Elexacaftor/Tezacaftor/Ivacaftor in Cystic Fibrosis Patients: The Value of the Ex Vivo Nasal Epithelial Model to Address Non-Responders to CFTR-Modulating Drugs

Elvira Sondo <sup>1,†</sup>, Federico Cresta <sup>2,†</sup>, Cristina Pastorino <sup>3</sup>, Valeria Tomati <sup>1</sup>, Valeria Capurro <sup>1</sup>, Emanuela Pesce <sup>1</sup>, Mariateresa Lena <sup>1</sup>, Michele Iacomino <sup>1</sup>, Ave Maria Baffico <sup>4</sup>, Domenico Coviello <sup>4</sup>, Tiziano Bandiera <sup>5</sup>, Federico Zara <sup>1,3</sup>, Luis J. V. Galletta <sup>6,7</sup>, Renata Bocciardi <sup>1,3</sup>, Carlo Castellani <sup>2,‡,\*</sup> and Nicoletta Pedemonte <sup>1,‡,\*</sup>

<sup>1</sup> UOC Genetica Medica, IRCCS Istituto Giannina Gaslini, 16147 Genova, Italy; elvirasondo@gaslini.org (E.S.); valeriatomati@gaslini.org (V.T.); valeriapapurro@gaslini.org (V.C.); emanuela.pesce@yahoo.it (E.P.); mariateresalena@gaslini.org (M.L.); micheleiacomino@gaslini.org (M.I.); federico.zara@unige.it (F.Z.); renata.bocciardi@unige.it (R.B.)

<sup>2</sup> UOSD Centro Fibrosi Cistica, IRCCS Istituto Giannina Gaslini, 16147 Genova, Italy; federicocresta@gaslini.org

<sup>3</sup> Department of Neurosciences, Rehabilitation, Ophthalmology, Genetics, Maternal and Child Health (DINOEMI), University of Genoa, 16132 Genova, Italy; cristinapastorino22@gmail.com

<sup>4</sup> UOC Laboratorio di Genetica Umana, IRCCS Istituto Giannina Gaslini, 16147 Genova, Italy; avemariabaffico@gaslini.org (A.M.B.); domenicooviello@gaslini.org (D.C.)

<sup>5</sup> D3-PharmaChemistry, Fondazione Istituto Italiano di Tecnologia, 16163 Genova, Italy; tiziano.bandiera@iit.it

<sup>6</sup> Telethon Institute of Genetics and Medicine (TIGEM), 80078 Pozzuoli, Italy; l.galletta@tigem.it

<sup>7</sup> Department of Translational Medical Sciences (DISMET), University of Naples Federico II, 80131 Naples, Italy

\* Correspondence: carlocastellani@gaslini.org (C.C.); nicolettapedemonte@gaslini.org (N.P.)

† These authors contributed equally as first authors.

‡ These authors contributed equally as last authors.

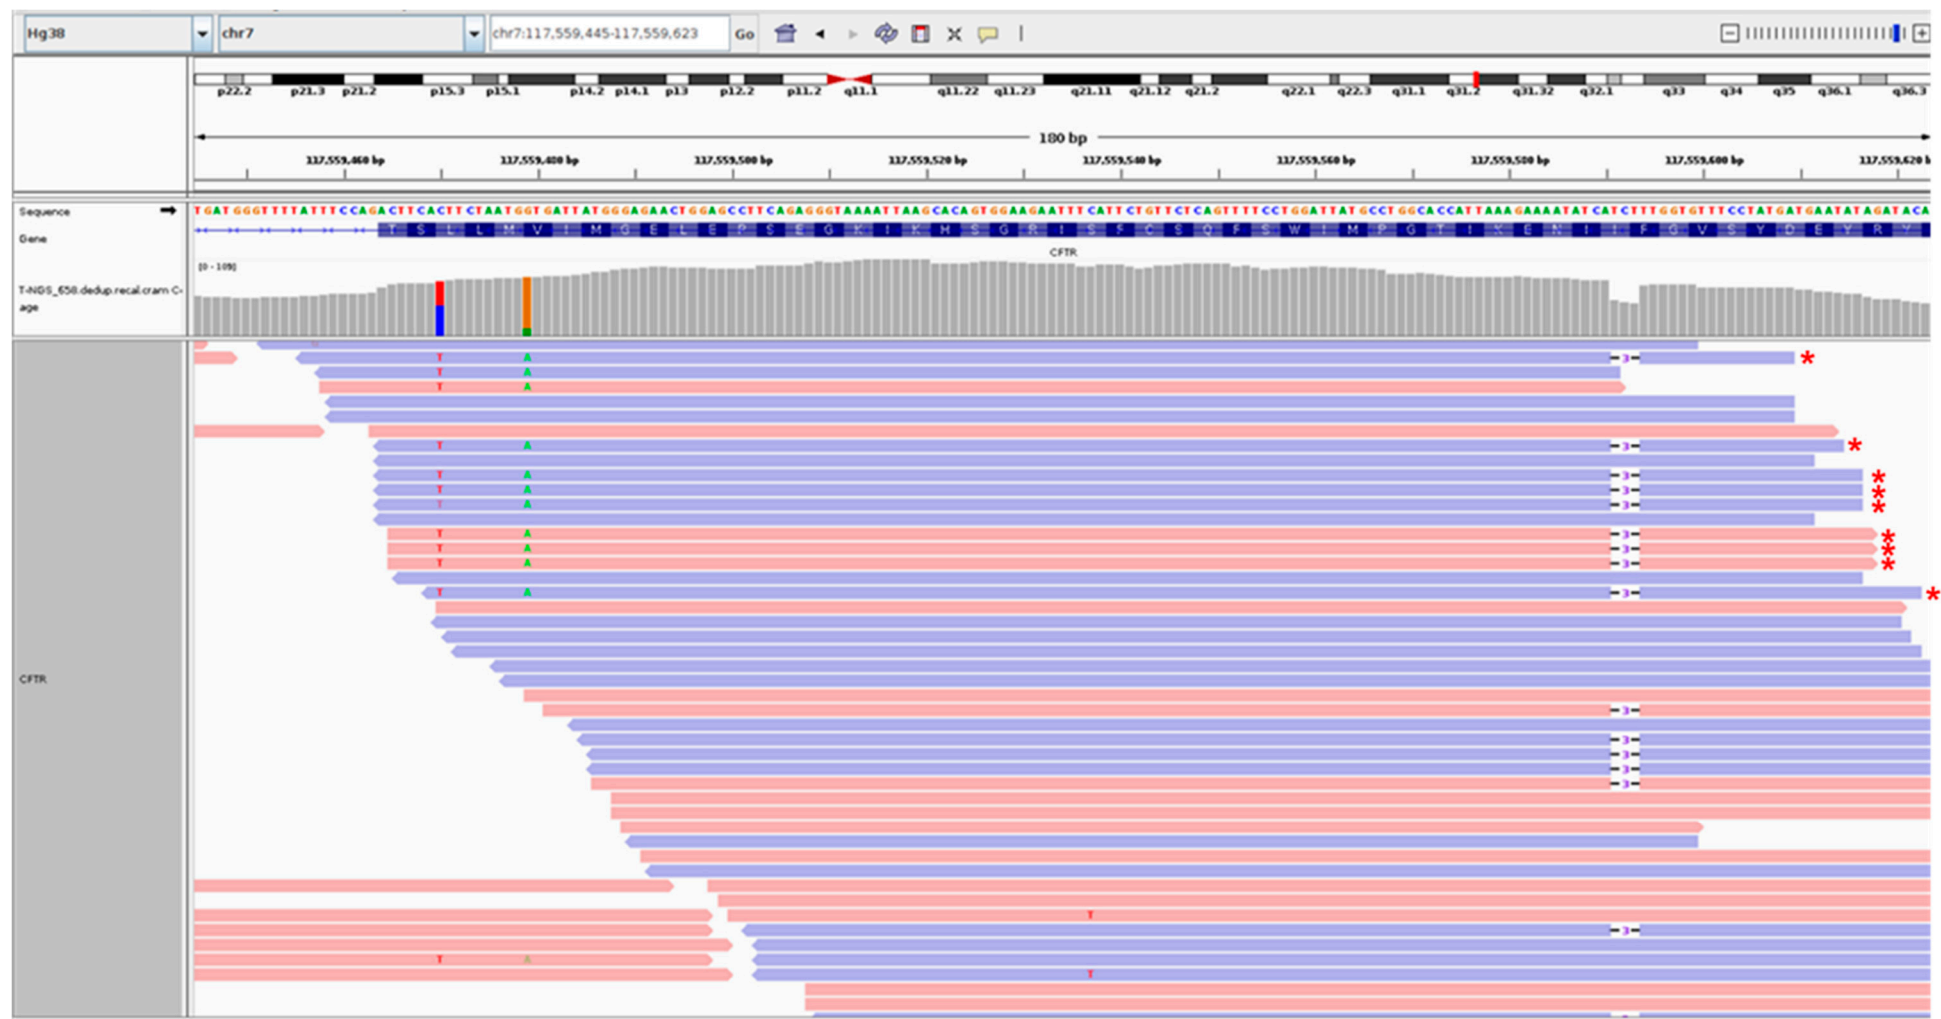

**Figure S1.** The L467/F508del complex allele and the Gaslini exome genomic database. Genomic window spanning a region of the *CFTR* exon 11 generated by the Integrative Genomics Viewer (IGV) and displaying the BAM alignment track mapped read-segments per reference sequence (GRCh38/hg38). Red asterisks indicate the reads showing the mismatch positions corresponding to the presence of the L467F (T, red) and F508del (-3-) variants in cis in the same sequence fragment. A further mismatch (A, green) in cis with the two variants corresponds to the presence of the V470M polymorphism
